# Supplementary material for: Peel-and-Stick: Mechanism Study for Efficient Fabrication of Flexible/Transparent Thin-film Electronics
Source: PubMed Central journal article supplement — Sci Rep. 2013 Oct 10;3:2917. doi: 10.1038/srep02917 (PMC3794378; doi:10.1038/srep02917), 2013-10-10

## Supplementary Information

### **Peel-and-Stick: Mechanism Study for Efficient Fabrication of Flexible/Transparent Thin-film Electronics**

Chi Hwan Lee<sup>1</sup>, Jae-Han Kim<sup>2</sup>, Chenyu Zou<sup>3</sup>, In Sun Cho<sup>1</sup>, Jeffery M. Weisse<sup>1</sup>, William Nemeth<sup>4</sup>, Qi Wang<sup>4</sup>, Adri C. T. van Duin<sup>3</sup>, Taek-Soo Kim<sup>2\*</sup> and Xiaolin Zheng<sup>1\*</sup>

<sup>1</sup>Department of Mechanical Engineering, Stanford University, CA, 94305, USA

<sup>2</sup>Department of Mechanical Engineering, KAIST, Daejeon 305-701, Korea

<sup>3</sup>Department of Mechanical and Nuclear Engineering, Pennsylvania State University, University Park, Pennsylvania 16802-1414, USA

<sup>4</sup>National Renewable Energy Laboratory, Golden, CO, 80401, USA

\* Co-corresponding authors: [xlzheng@stanford.edu](mailto:xlzheng@stanford.edu); [tskim1@kaist.ac.kr](mailto:tskim1@kaist.ac.kr)

## Figures S1-S3:

**Figure S1. Basic procedures of the peel-and-stick process. (Step 1)** Thin-film electronic devices are fabricated on a metal (*e.g.*, Ni, Cu) coated SiO<sub>2</sub>/Si wafer. A removable protection layer (*e.g.*, Polymethyl methacrylate (PMMA)) can be applied on top of the thin-film electronic devices to protect them from water. **(Step 2)** Entire structure is soaked in a water bath at 21°C, and with a temporary holder (*e.g.*, thermal release tape), an edge of the structure is slightly peeled back to promote the water-assisted subcritical debonding at the metal-SiO<sub>2</sub> interface. **(Step 3)** The peeled thin-film electronic devices are pasted on a receiver substrate using a commercial adhesive agent (*e.g.*, Polydimethylsiloxane (PDMS), Polyvinyl alcohol (PVA)). After the peel-and-stick process, the SiO<sub>2</sub>/Si wafer can be reused.

**Figure S2. Experimental setup for double-cantilever-beam tests. (a)** An optical image and schematic of the experimental setup for the double-cantilever-beam tests used to measure the debond growth rate of the Ni-SiO<sub>2</sub> interface in a water bath at 21°C. **(b)** A schematic of the structures and thicknesses used for the double-cantilever-beam specimen.

**Figure S3. Surface characterizations of the delaminated Ni film and spin-on-glass surfaces. (a)** An optical image of the delaminated Ni film (left) and spin-on-glass (right) surfaces. **(b)** Corresponding 3D optical images of the delaminated Ni film (top) and spin-on-glass (bottom) surfaces. Defects are shown on both surfaces due to the inherent strong adhesion of the spin-on-glass.

### **Movies S1-S3:**

**Movie S1.** Molecular Dynamics (MD) simulation for the peel-off process of Ni-SiO<sub>2</sub> interface in dry-air environment.

**Movie S2.** Molecular Dynamics (MD) simulation for the peel-off process of Ni-SiO<sub>2</sub> interface in low-moist environment.

**Movie S3.** Molecular Dynamics (MD) simulation for the peel-off process of Ni-SiO<sub>2</sub> interface in high-moist environment.

**Figure S1.**

**(Step 1) Fabrication**

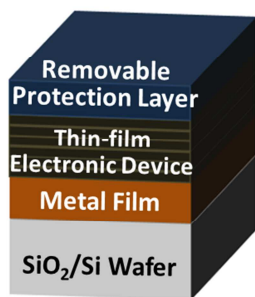

**(Step 2) Peel in water**

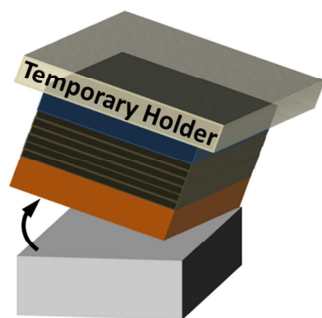

**(Step 3) Stick**

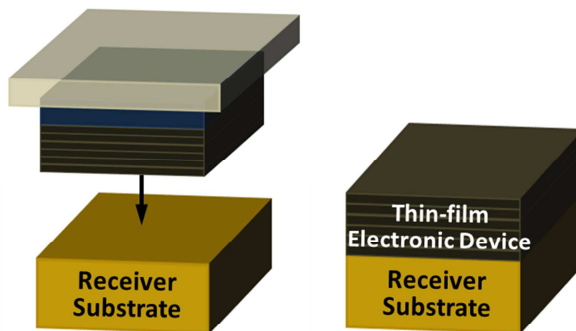

**Figure S2.**

**a** Double-cantilever-beam Test

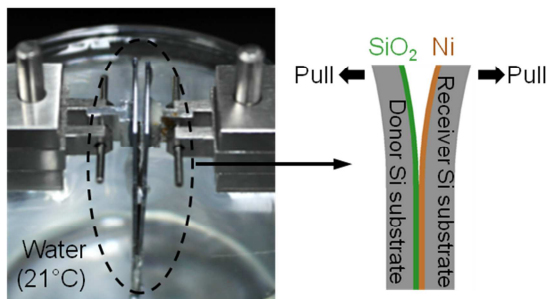

**b** Double-cantilever-beam Specimen

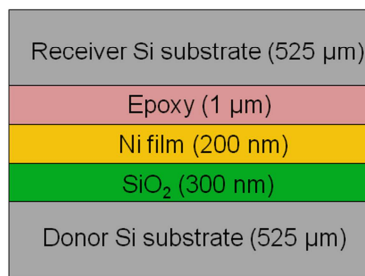

Figure S3.

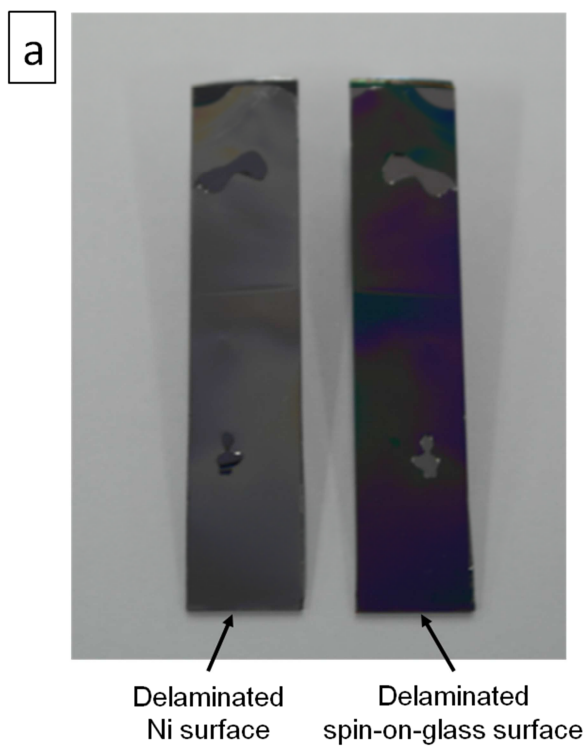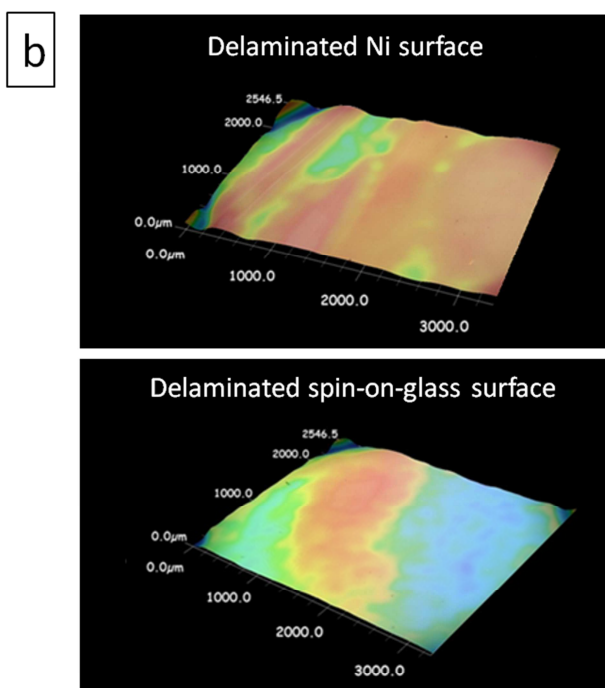

**Movie S1 Still Image.**

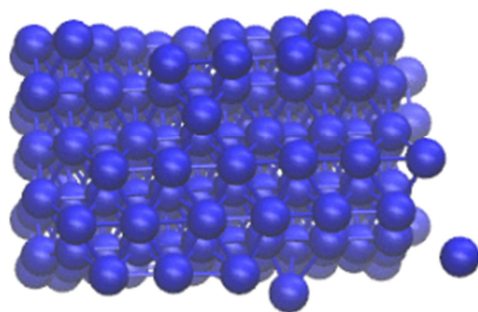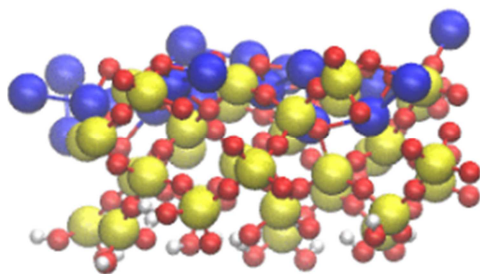

**Movie S2 Still Image.**

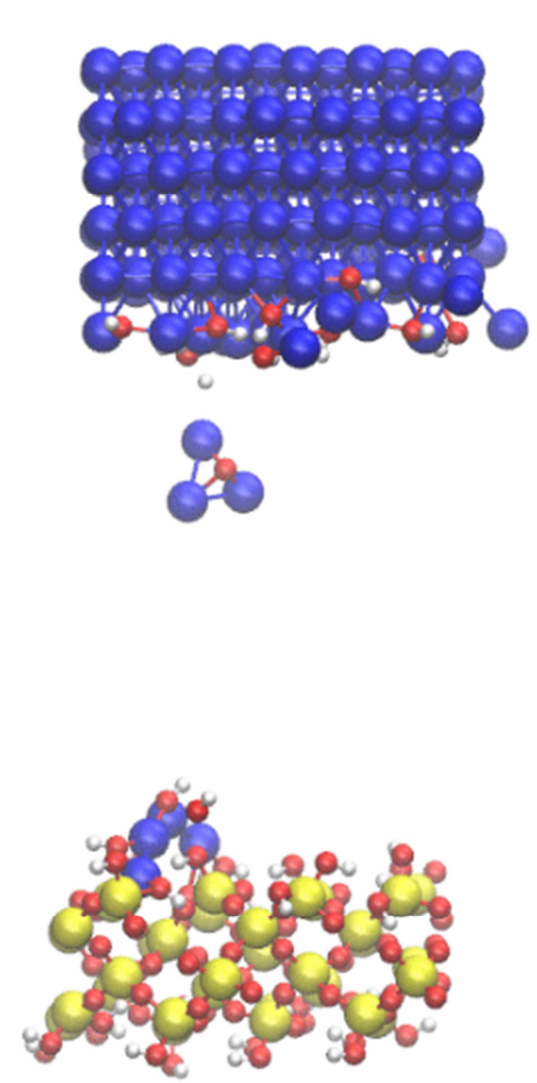



**Movie S3 Still Image.**

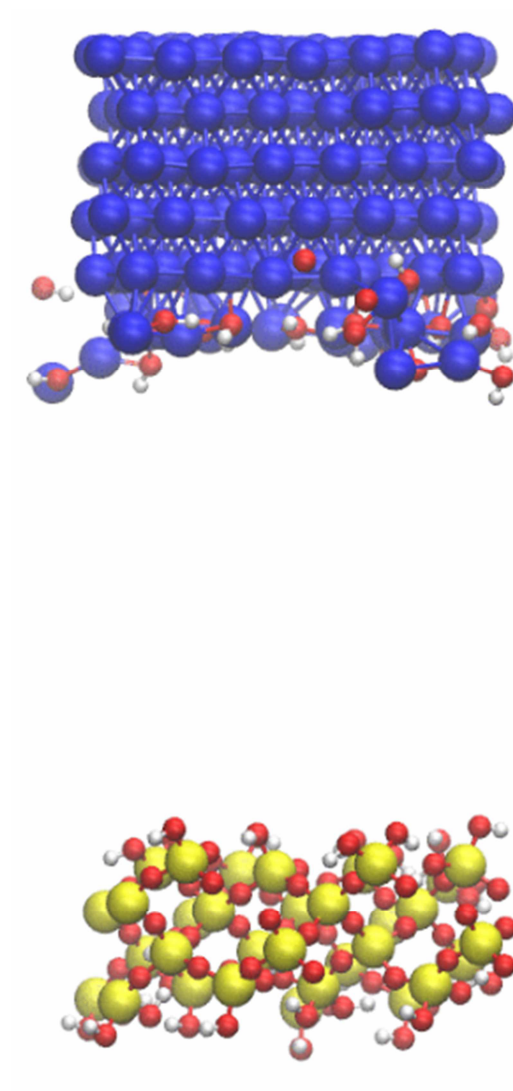

Supplement: srep02917-s1.pdf [file srep02917-s1.pdf]
